# Supplementary material
Source: PubMed Central journal article supplement (PMC4051316)
Supplement: NIHMS553571-supplement-1_si_001.pdf [file NIHMS553571-supplement-1_si_001.pdf]

## Circular Permutation of a WW Domain: Folding still occurs after Excising the Turn of the Folding-Nucleating Hairpin

Brandon L. Kier, Jordan M. Anderson & Niels H. Andersen, University of Washington, Seattle, WA

### SUPPORTING FIGURES, tables, and text

**Table S1: A complete list of peptides investigated in this study, with names, sequences, melting temperatures, and justification:**

| Name                                                                                  | Sequence. (Capping Trps: Blue. Core Trp: Red.) | T <sub>M</sub> (°C) |
|---------------------------------------------------------------------------------------|------------------------------------------------|---------------------|
| <b>WW Domains</b>                                                                     |                                                |                     |
| WW st34<br>full-length positive control                                               | KLPPGWEKRWDRGSGRWFYFNRTGKRQFERPSD              | 94                  |
| WW st29<br>full-length standard-topology low-melting enough for lineshape studies     | ---KGWEKRWDRGSGRWFYFNRTGKRQFERP--              | 74                  |
| WW cp34<br>initial test of circular permutation                                       | RWFYFNRTGKRQFERPSDRGSGKLPFGWEKRW               | 63                  |
| WW cp34 VK<br>circular permutant with prolines removed, to remove spurious NMR peaks  | RWFYFNRTGKRQFERPSDRGSGKLVKGWEKRW               | 59                  |
| WW cp29<br>shorter circular permutant; lower-melting and no spurious NMR peaks        | RWFYFNRTGKRQFERPK--G---LVKGWEKRW               | 53                  |
| <b>Fragment Peptides: Hairpin 1</b>                                                   |                                                |                     |
| stHP1wt<br>simple excision of the first hairpin of wild-type WW Pin1                  | RWEKRMSRSSGRVYFNS                              | <<0                 |
| stHP1<br>optimized WW hairpin 1; vast improvement over wild-type                      | RWEKRWDRGSGRWFYFND                             | 60                  |
| stHP1 PATG<br>further optimization of the turn of WW hairpin 1; faster-folding        | RWEKRWNPATGRWFYFND                             | 77                  |
| cpHP1wt<br>excision plus circular permutation of the first hairpin of wt WW Pin1      | RVYFNSRSSGRWEKRMS                              | <<0                 |
| cpHP1<br>circular permutation of the optimized WW hairpin 1                           | RWFYFNDRGSGRWEKRW                              | 34                  |
| cpHP1 PATG<br>further optimized (better turn) circular permutant of hairpin 1; faster | RWFYFNDRGSGRWEKRW                              | 49                  |
| cpHP1 pG<br>further optimized (better turn) circular permutant of hairpin 1           | RWFYFNI-pG-KWEKRW                              | 65                  |
| <b>Beta-Loop-Beta: Long Loop Peptides</b>                                             |                                                |                     |
| blb30<br>testing feasibility of beta cap assembly with long contact order             | RWITVTIGGGGKKGKGGGGKIRVWE                      | 30                  |
| blb36<br>testing feasibility of beta cap assembly with longer contact order           | RWITVTIGGGGKKGKGGGGKIRVWE                      | 6                   |
| blb16<br>positive control for the blb series; two residue loop.                       | RWITVTIGGKIRVWE                                | >85                 |

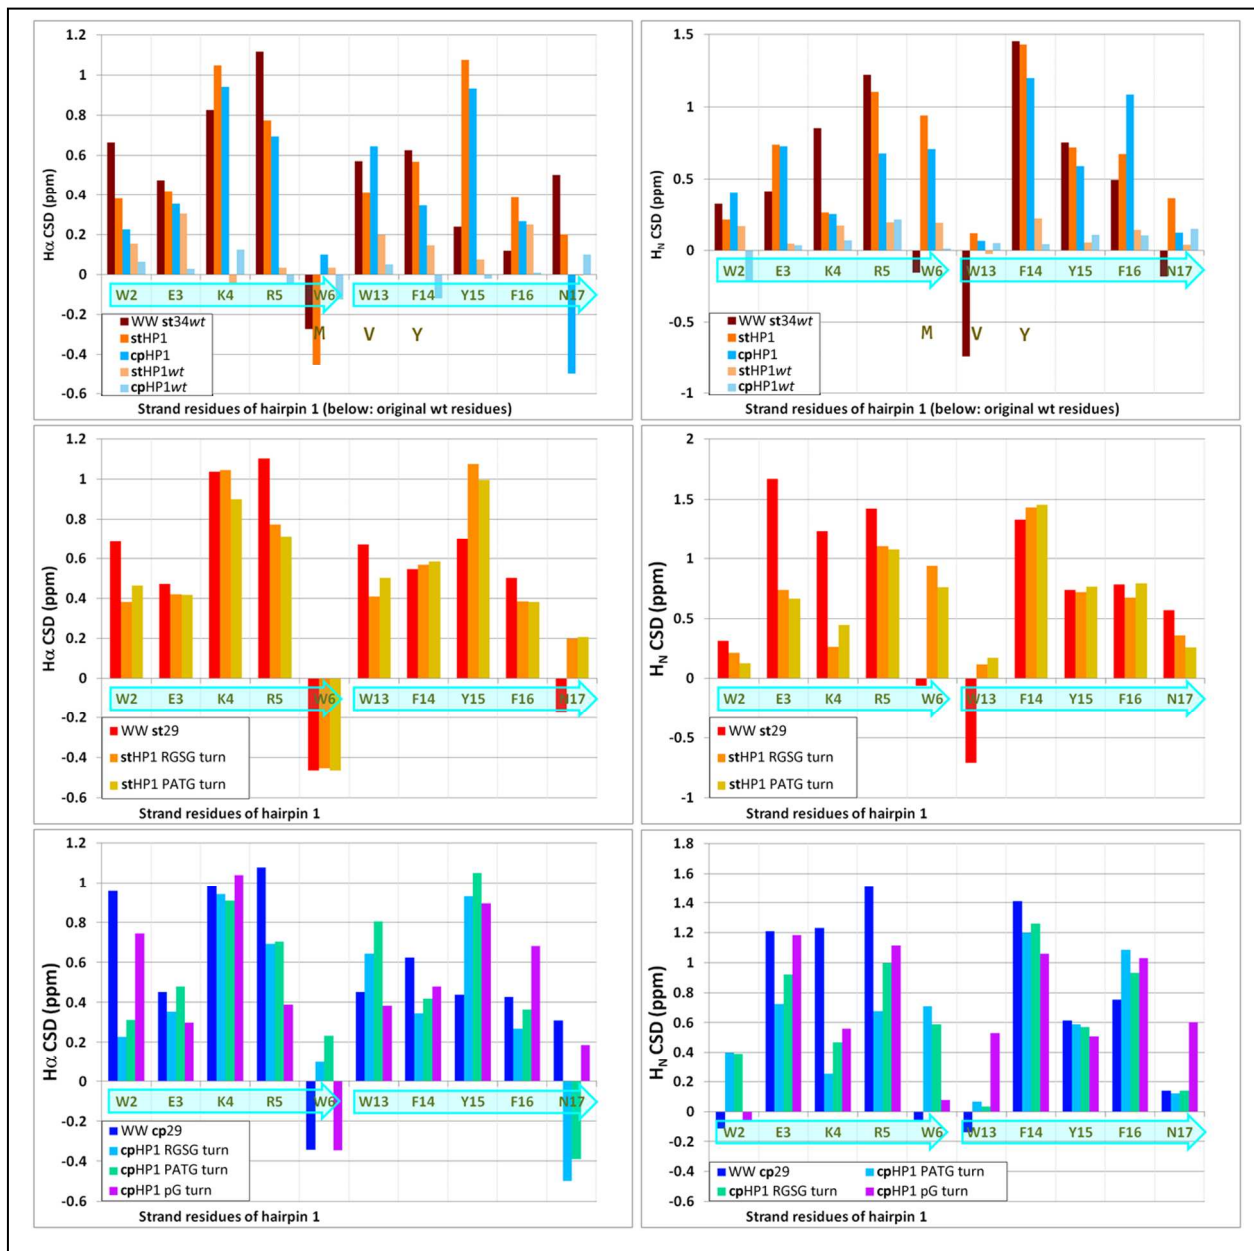

**Fig. S1. A** (top panel), **stHP1wt** and **cpHP1wt** (native hairpin & its circular permutant), **stHP1** and **cpHP1** (optimized hairpin & its circular permutant) compared to wild-type WW Pin1 (WW **st34wt**) over the strand residues of the first hairpin. **B** (middle panel), **stHP1** and its more stable turn mutant, **stHP1-PATG** compared to WW **st29**. **C** (lower panel), **cpHP1** and two stabilizing turn mutants PATG and pG) compared to WW **cp29** over the same residues. The pattern of H $_N$  and H $\alpha$  CSDs (chemical shift deviations) are consistent with expectations for hairpin folds. (1-3)

**Fig. S2A.** CD melts showing the loss of both the exciton couplet and the positive peak at ca. 196 nm due to the associated  $\beta$ -strands of two hairpins (**stHP1** left, and **cpHP1** right).

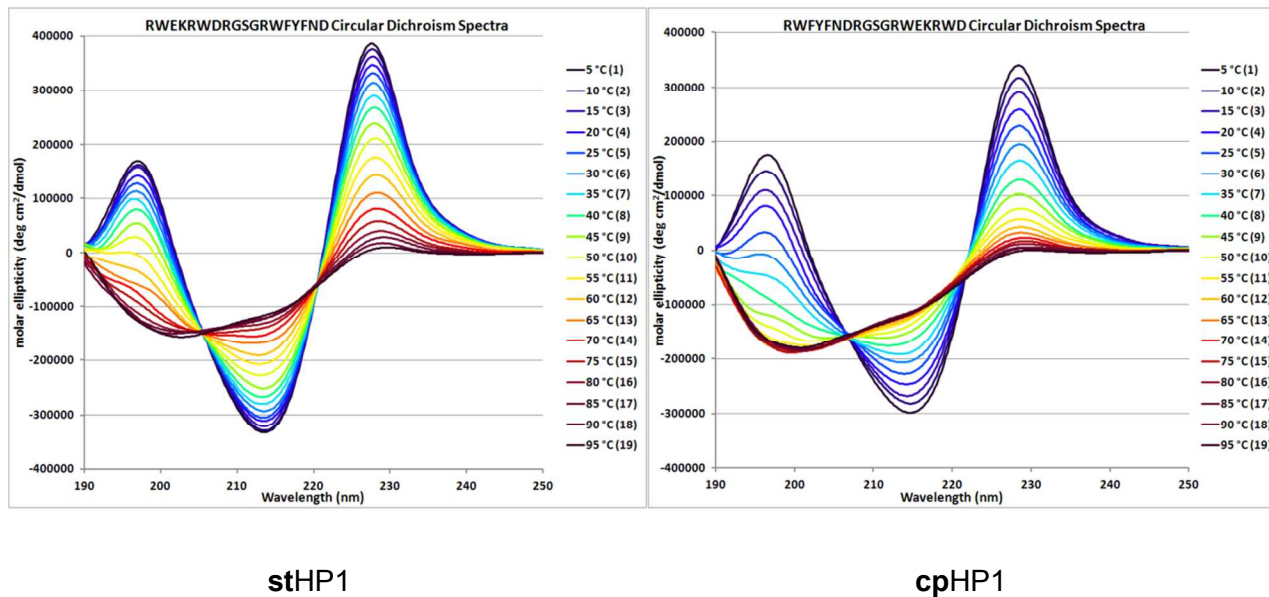

**Fig. S2B.** CD melts as  $[\theta]_{228}$  versus temperature for the five WW-related hairpin fragments investigated in this study. (From top to bottom: **stHP1** orange, **cpHP1** blue, **stHP1-PATG** yellow, **cpHP1-PATG** teal, **cpHP1-pG** magenta.)

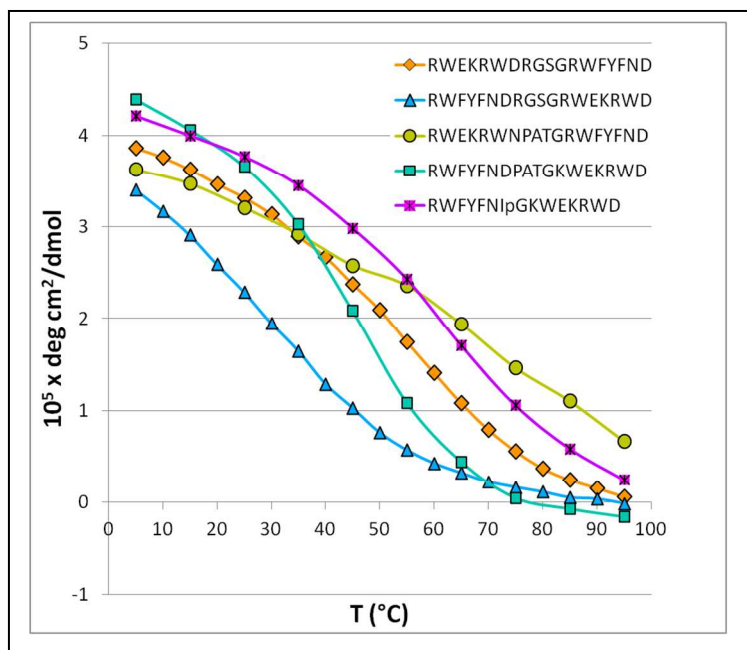

**Fig. S3.** 1D proton NMR data collected in D<sub>2</sub>O medium at 310K showing the linewidth differences between the WW domains WW **st**29 (standard topology) and WW **cp**29 (the circular permutant). The less upfield shifted (but broader) Trp H $\epsilon$ 3 and H $\zeta$ 3 signals for the permuted sequence reflect an increased population of the unfolded state and a slower folding rate, respectively.

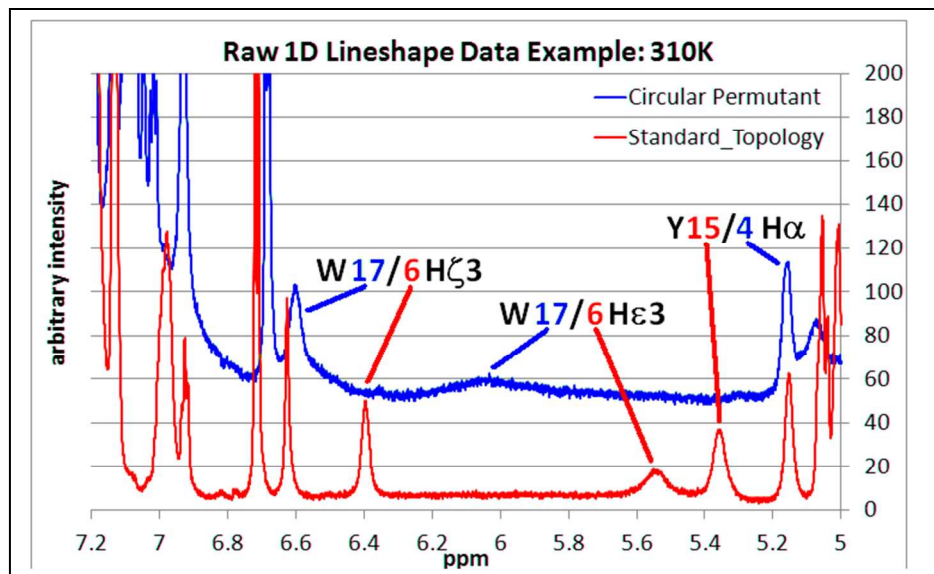

Similar effects are observed for the hairpin models. The method used to extract the exchange broadening term is illustrated in Fig. 2 in the main text.

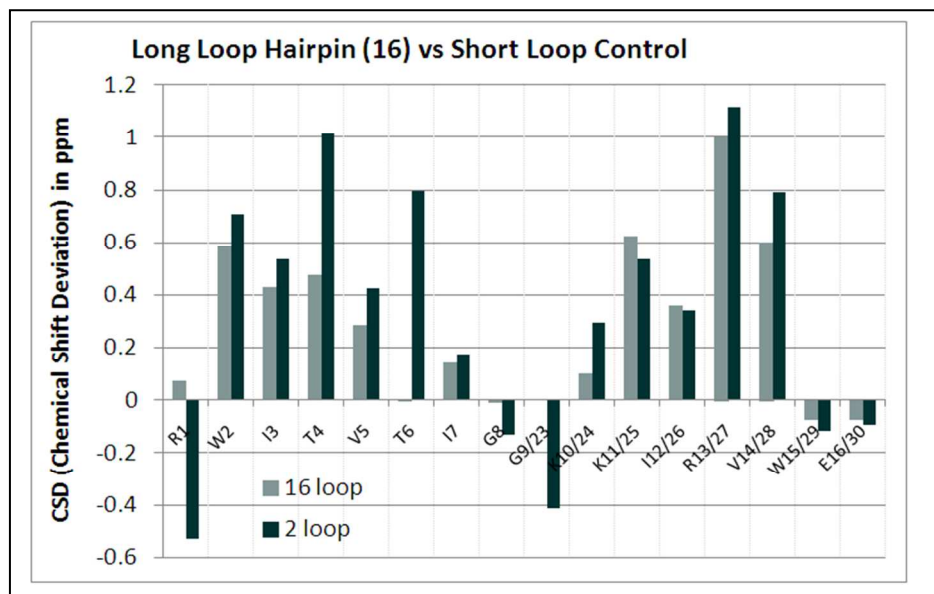

**Fig. S4.** A chemical shift comparison (as CSDs) of long loop RWITVTI(GGGGKK)<sub>3</sub>IRVWE (**blb**30, loop length: 16) with RWITVTI-GG-KKIRVWE (**blb**16, loop length: 2) which has  $\chi_F > 0.96$  based on its CD and NMR melt.

### Alternate loop structures within the folded ensemble.

The NMR spectra of WW **cp34** had alternate sets of resonances for many proton sites (Fig. S5) indicating the presence of at least one other minor folded isomer. We attributed this to cis/trans backbone isomers about the prolines in the loop and set about eliminating this complication by loop optimization and truncation as shown below.

RW-FYFNRTGKRQFERP - loop - WEKR-WD

WW **cp34**                      loop = SDRGSGKLPPG

WW **cp34**(P26V,P27K)      loop = SDRGSGKLVKG

WW **cp29**                      loop = KGLVKG

The replacement of the PP unit in the linking loop with VK had a very modest impact on stability, and reduced (though curiously, did not completely eliminate) the presumed cis/trans isomer complication. (Fig. S5, bottom). We were able to reduce the loop length by 5-residues and retain fold formation. At 29 residues, the chain length of WW **cp29** one residue less than that of the starting WT topology.

**Fig. S5.** Illustrating additional peaks that are present due to an additional folded species in slow exchange. Both panels are of a circularly permuted WW domain. The top panel is WW **cp34** which has an SDRGSGKLPPG sequence in the loop connecting two  $\beta$  strands. In the case of WW **cp34** (P26VP27K), those two prolines were replaced by a Val-Lys unit. Both panels show the H $\epsilon$ 1 signals for the three Trp residues.

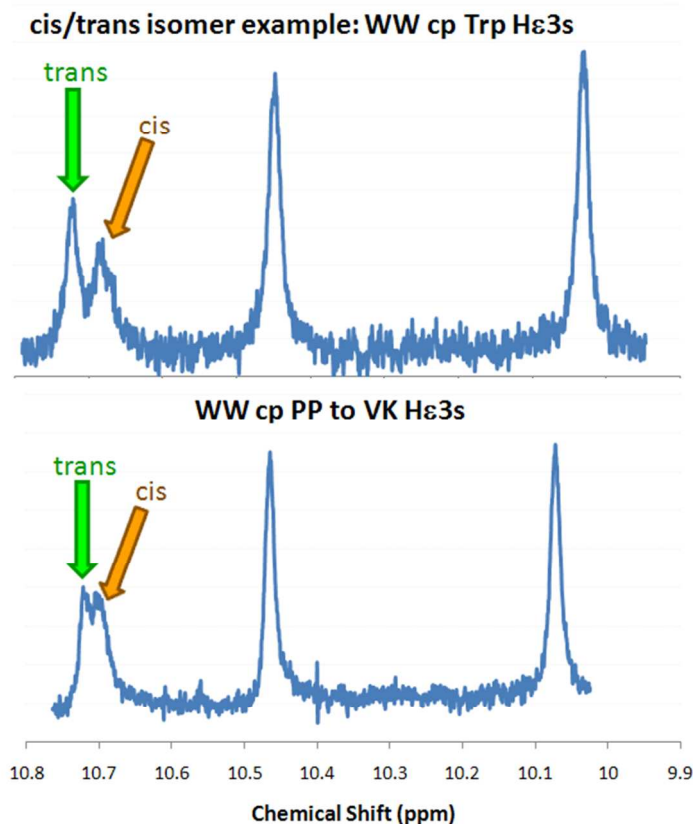

The minor isomer signal is labeled “cis” in each case. There are also minor peaks, typically only partially resolved, for other loop residues and other sites in Trp6. Additional connectivities cannot be traced in the NOESY. The “cis” peaks are broader, and integrate to almost 60% of “trans”. There is no clear NOE evidence for cis-proline (e.g., no obvious  $i/i+1$  H $\alpha$  to H $\alpha$  peak) so this “cis” peak could be some other type of slow-exchanging alternate conformer. Though slow & specific oligomerization is unlikely, it would likely produce a set of alternate peaks localized at the interface, and would not be incompatible with this data.

This set of alternate peaks is only observed for the long-loop circular permutants, and is independent of pH. No extra peaks are observed for WW **cp29**.

## Chemical Shift Comparisons, wild type topology versus circular permutants.

Fig. S6A. The proton chemical shift comparison for WW **cp29** and the wild-type WW Pin1 (**st34wt**)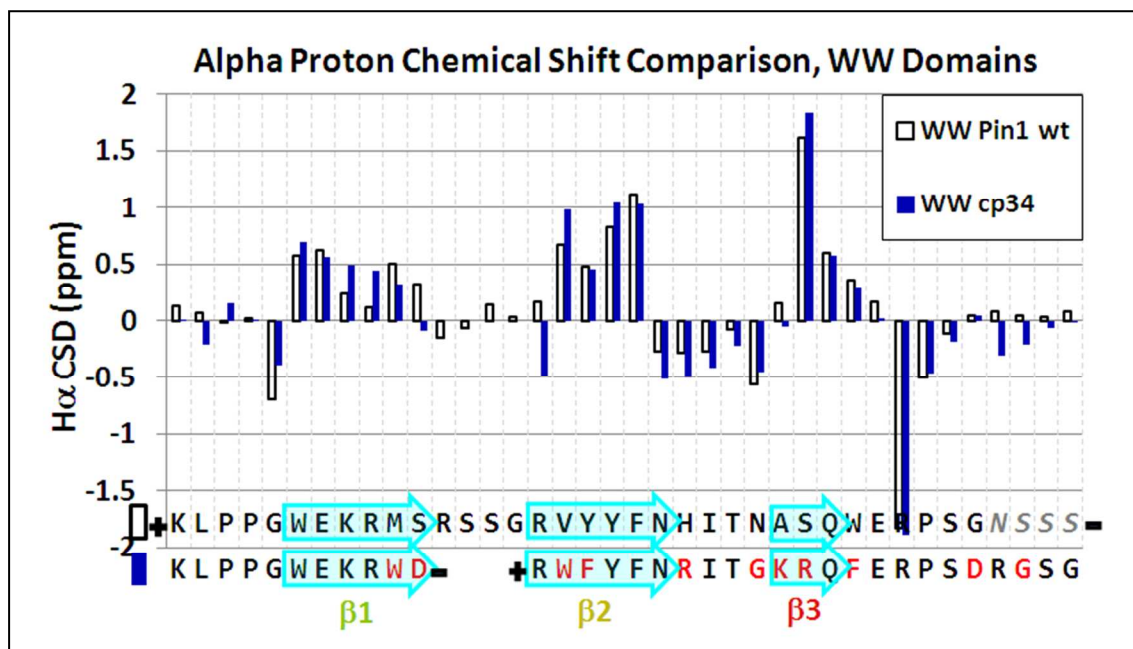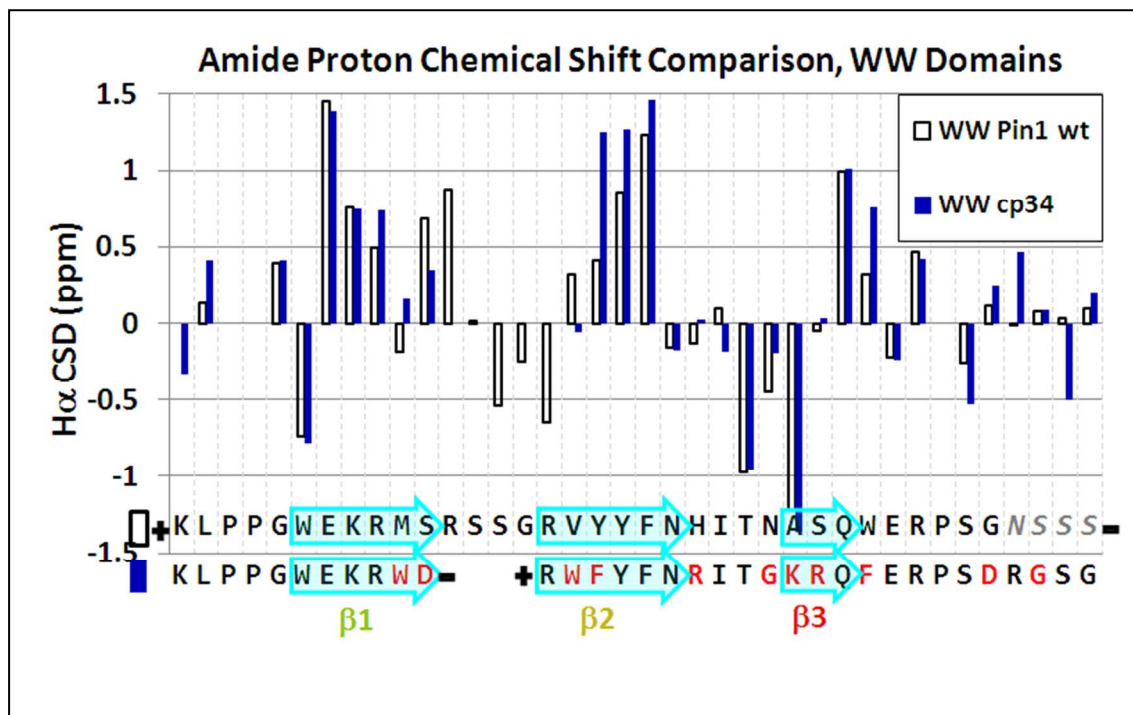

**Fig. S6B.** Proton chemical shift comparisons (as CSDs) for three sequences with the same residues throughout the core WW fold region: the hyperstable WW **st34**, its truncated variant WW **st29**, and the circular permutant WW **cp29**.

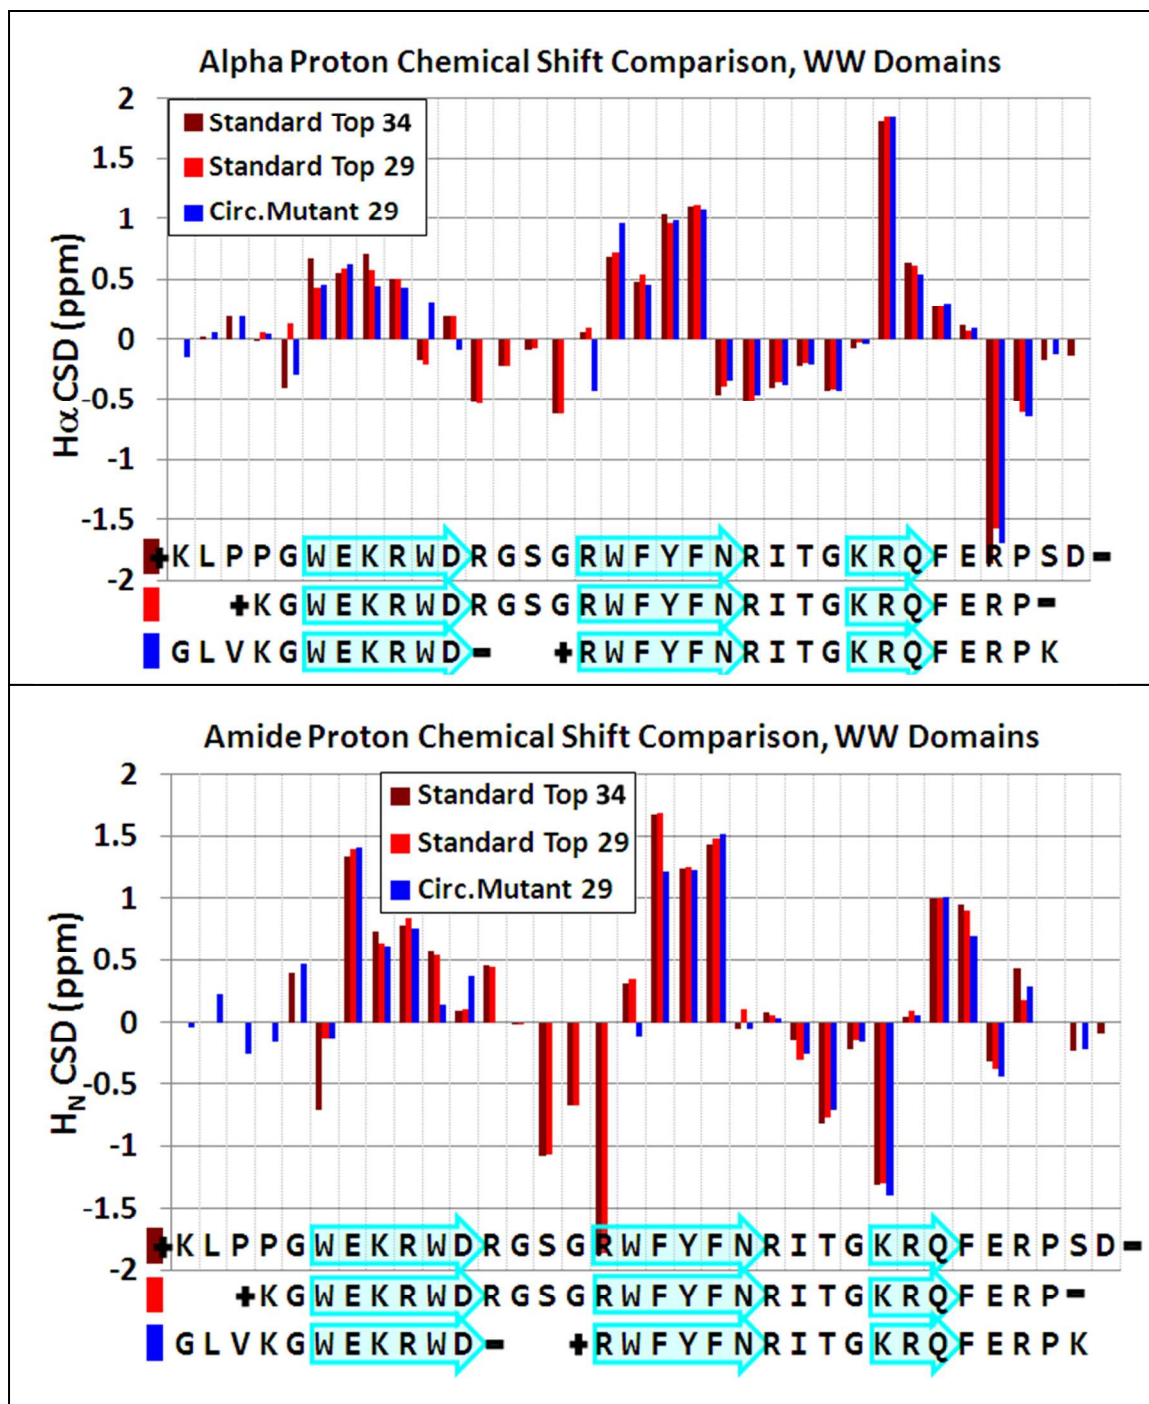

Better CSD correspondence was observed between the circular permutants and the mutated (hyperstable) Pin1 sequence, vs. the circular permutants and wild-type Pin1. This is an expected result of higher sequence identity, and allows for more a more precise analysis of the effect of circular permutation.

**Fig. S7.** Fully folded CSD versus temperature plots for the probes used in dynamics analysis: taken from the hyperstable standard topology construct (WW st34) at temperatures well below its melting transition ( $T_m = 94\text{ }^\circ\text{C}$ ).

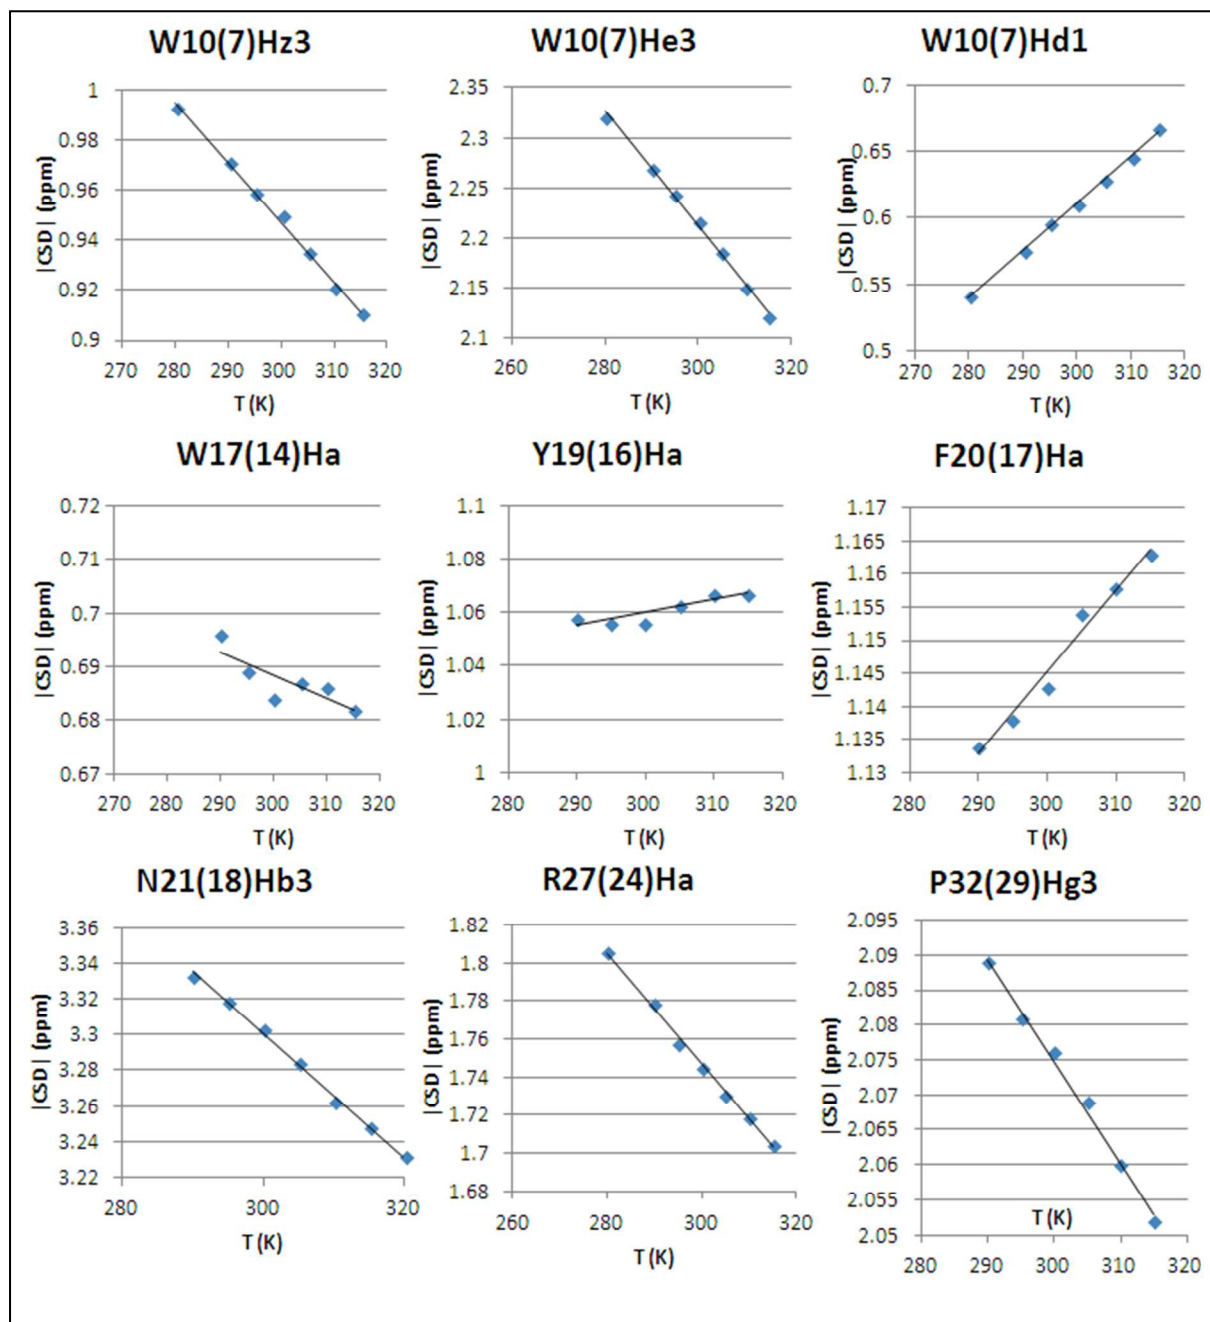

With the exception of the W17(14), Y19(16) and F20(17) H $\alpha$  CSDs, which are downfield due to cross-strand interactions in the  $\beta$ -sheet (2), the other CSDs are negative, reflecting upfield ring-current shifts. The temperature dependence in the folded state  $\delta$  values is attributed to increased fluctuation of aryl group chi values on warming.



**Fig. S8.** Folding dynamics data for WW **st29** (top panel) and WW **cp29** (lower panel) showing the points for each exchange-broadened probe employed.

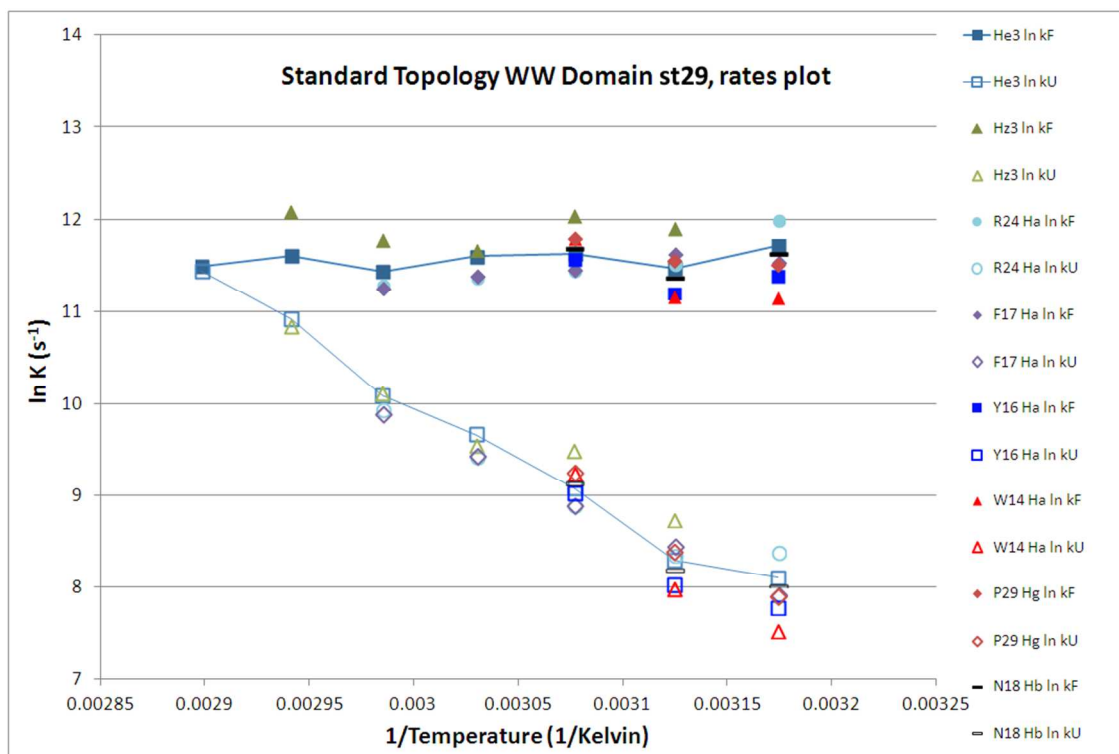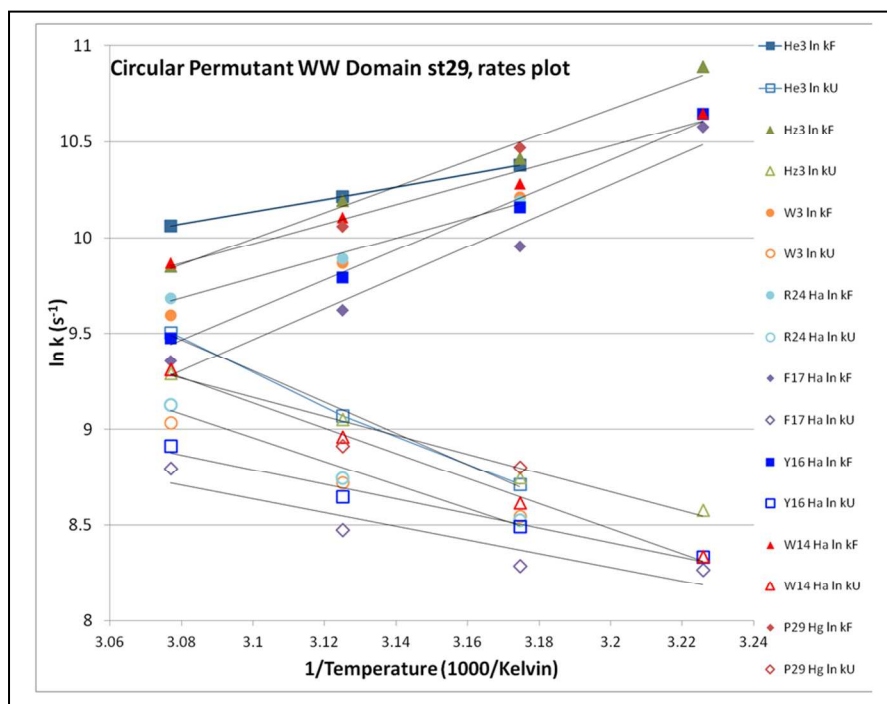

Some probes were not usable, or accessible, at all temperatures, due to either too much or too little line broadening, or direct overlap with another peak.

Although the scale employed in the lower panel appears to indicate greater variation between probes, it was actually comparable for the two species. For WW **cp29**, the largest error in  $\ln k$  was  $\pm 0.24$ . We view the observation of essentially identical Arrhenius plot slopes as evidence for 2-state folding in this system.

### Exploring an Alternative Circular Permutation Cut Point (excision of turn-2)

While circular permutation is a highly useful technique for probing folding pathways, it is not always obvious when it will prove viable. While we had great success in excising fold-nucleating turn 1, excision of less-crucial turn 2 (that is, design of a WW domain circular permutant with its termini moved to turn 2) proved more problematic. Our difficulties were likely a consequence of the smaller size and thus docking propensity of strand 3. Instead of a complete WW domain that folds via a standard 2-state mechanism, we instead observed – for all 3 attempts - a fully-folded hairpin1 and very broad lineshapes elsewhere. Evidence for a significant population (>50%) of complete WW domain was observed (e.g., certain large chemical shifts, etc.) but the protein was very difficult to characterize, and solubility was poor. This and the construction of circularly permuted Pin1 variant with tunable kinetic traps will require further study.

### Optimization Potential of WW st29:

We expect that WW st29 could fold at record-breaking speeds if known rate-enhancing mutations at the RGSG turn locus (e.g. [PATG]- or [ADG]-mutations) were applied to it. These constructs were expected to have  $T_m$  values well above our (NMR) temperature window, placing them outside the scope of the current study. However, these constructs could be amenable to NMR lineshape studies when combined with low-phi-value destabilizing mutations. We plan to investigate these possibilities as part of our ongoing optimization and rate characterization studies of WW st29 and cp29.

### The NMR structure of WW cp29

The structure ensemble generation procedure previously used for both hairpins (1,4,5) and small proteins (6-8) was applied to 473 NOE intensities observed for WW cp29. The automated distance-constraint derivation, MD annealing protocols (using a CNS script), and acceptance criteria were those described previously.(5,6) The structure statistics (Table S1) and distance constraints (Table S2) appear below.

The in-house program used to convert NOE intensities to distance constraints produces constraints in the form,  $d - \Delta d_{neg}$  to  $d + \Delta d_{pos}$  being the allowed distance range. Our calibration and error analysis procedure yields constraints that are tighter than those used in many NOE ensemble generation procedures. In the present case, it resulted in the following average values over the full set of NOE constraints:  $d = 3.25 \pm 0.60 \text{ \AA}$  ( $\pm 0.60$ ),  $\Delta d_{neg} = 0.58 \pm 0.31 \text{ \AA}$ , and  $\Delta d_{pos} = 0.52 \pm 0.20 \text{ \AA}$ . The large number and relative tightness of these constraints contributed to the lower-than-expected acceptance rate of the generated ensemble (22 structures of 40) and the somewhat larger than usual average NOE violation listed in Table S1.

Chemical shift data can be found in accession number 19503 at the Biological Magnetic Resonance Bank (BMRB) at [http://www.bmrb.wisc.edu/devise/peptide-cgi/html/uvd/pacu\\_20130923\\_20411/pacu\\_20130923\\_20411ps1.html](http://www.bmrb.wisc.edu/devise/peptide-cgi/html/uvd/pacu_20130923_20411/pacu_20130923_20411ps1.html).

**Fig. S9:** Structure of WW **cp29** (PDB ID 3tc7, **cyan**) overlaid with wild-type WW Pin1 domain (PDB ID 2mdu, **green**).

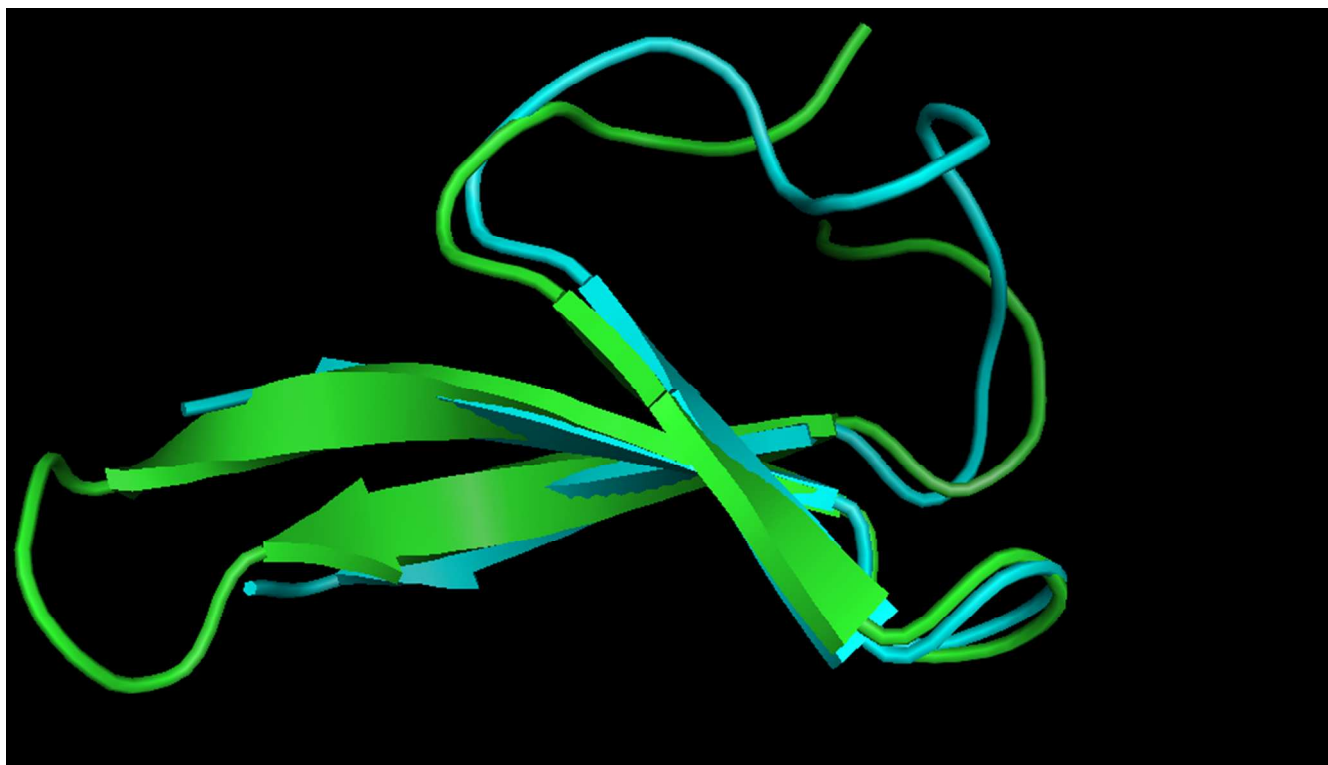

The only significant sidechain orientation difference in a shared region of sequence is highlighted: the WW **cp29** Phe14 vs. analogous wild-type Trp29, which adopt different  $\chi_1$  rotamers. (Though in our NMR ensemble, this Phe was flexible and could be found in the native rotamer in some structures.)

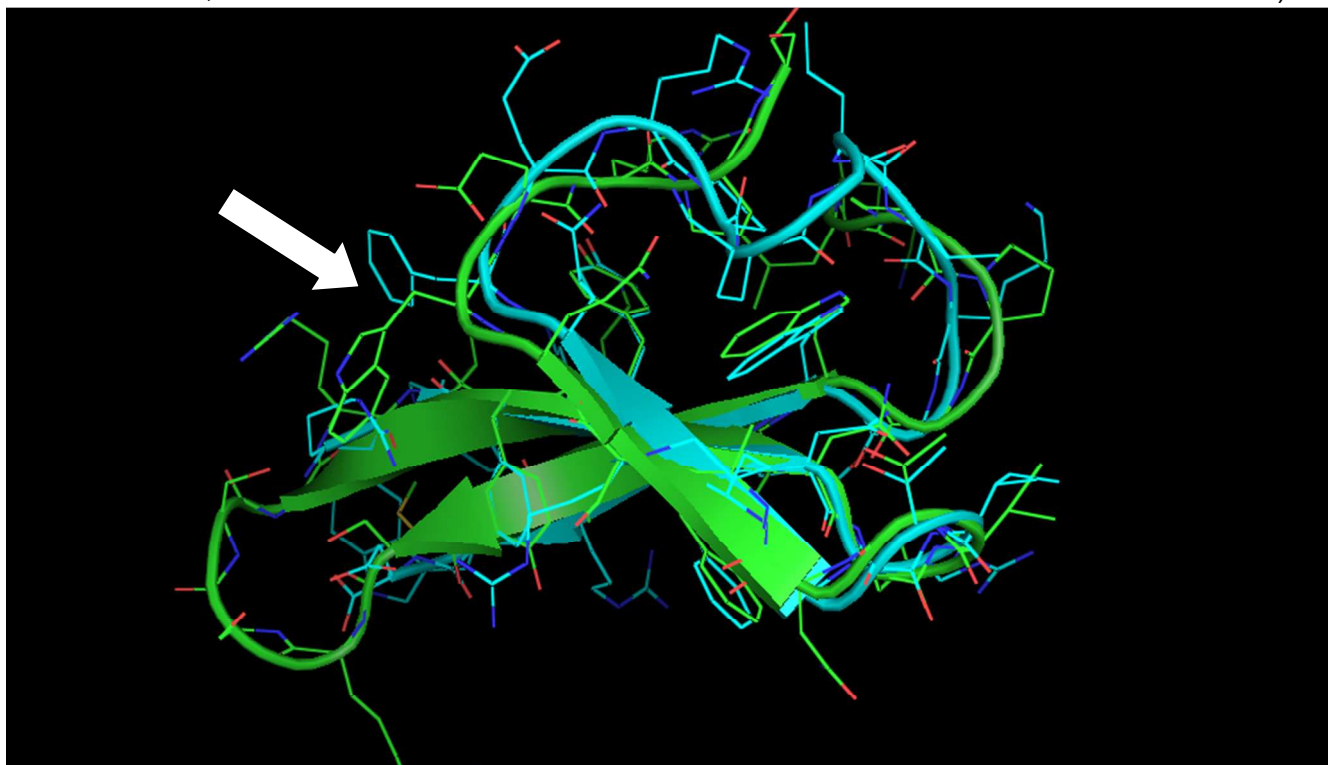

The only other points of difference are across non-shared sequence space; e.g., the connecting loops which are excised from the other constructs. The essential proline (WW **cp29**: P17, wild-type: P32), adopts a similar, but not identical, orientation between structures, and the residues beyond that (the connecting loop region of WW **cp29**, and the C-terminal residues of the wild-type) deviate significantly. Similarly, the opposite end of WW **cp29**'s loop only overlays well with the N-terminal residues of the wild-type at or after residue K22 (P4 of wild-type). These loop/terminal residues were not included in the backbone heavy-atom RMSD calculation of 1.08 angstroms. The RMSD near the tighter loop of the wild-type's hairpin 1 (the beta-capped termini of WW **cp29**) is significantly better.

Because the connecting loop of WW **cp29** cannot adopt the same orientation the very N and C terminal tails of the wild-type that it replaces, one hydrophobic packing interaction is lost: the contact between the wild-type's L2 with hydrophobic core residues W6 and Y19. Though this interaction is known to be stabilizing, it is inessential, and the N-terminal tail is flexible. The N-terminal sequence segment is not present in some NMR and crystal structures, presumably due to flexibility (e.g., PDB ID 1zr7). In our longer, hyperstable standard-topology WW domain (WW **st34**), L2 had practically no CSDs, and its NOEs to hydrophobic core residues were much weaker than expected, given its expected structure. (It was expected to be identical to wild-type, as there are no mutations in this region. All other diagnostics matched expectations from the wild-type structure; for example, the CSD diagnostics of figures S6A&B.)

**Table S2. WW cp29, NMR structure ensemble statistics (22 accepted structures from 40).**

| Type of constraint                                                     | Number          |
|------------------------------------------------------------------------|-----------------|
| Intraresidue                                                           | 222             |
| Sequential                                                             | 101             |
| <i>i</i> / <i>i</i> + <i>n</i> , <i>n</i> = 2-4                        | 32              |
| <i>i</i> / <i>i</i> + <i>n</i> , <i>n</i> ≥ 5                          | 118             |
| Structure statistics <sup>a</sup> :                                    | r.m.s deviation |
| <i>E</i> <sub>vdW</sub> (kcal/mol)                                     | -7.3 ± 80.1     |
| Bond violations (Å)                                                    | 0.011 ± 0.002   |
| Angle violations (°)                                                   | 1.11 ± 0.15     |
| Improper torsion violations (°)                                        | 0.94 ± 0.25     |
| NOE violations (Å)                                                     | 0.13 ± 0.034    |
| Convergence within final ensemble, atomic r.m.s deviations (Å, ±s.e.): |                 |
| Pairwise over the entire ensemble                                      |                 |
| Backbone                                                               | 1.30 ± 0.72     |
| Heavy atom                                                             | 2.38 ± 0.73     |
| Excepting the loop connecting former termini (residues 18-22)          |                 |
| Backbone                                                               | 0.77 ± 0.40     |
| Heavy atom                                                             | 1.87 ± 0.51     |

<sup>a</sup> Values are mean ± standard deviation over the 22 accepted structures.

**Table S3. NOE-derived distance constraints used to elucidate the WW CircMutant (cp29) structure.**

| range | #1 proton | #2 proton | distance (Å) | $\Delta d_{\text{neg}}$ (Å) | $\Delta d_{\text{pos}}$ (Å) |
|-------|-----------|-----------|--------------|-----------------------------|-----------------------------|
| 27    | 1 ha      | 28 hz3    | 3.33         | 0.54                        | 0.64                        |
| 27    | 1 ha      | 28 hh2    | 3.59         | 0.62                        | 0.73                        |
| 27    | 2 ha      | 29 hn     | 3.53         | 0.6                         | 0.51                        |
| 26    | 28 hz3    | 2 hd1     | 2.96         | 0.42                        | 0.74                        |
| 26    | 28 hz3    | 2 he1     | 3.19         | 0.49                        | 0.8                         |
| 26    | 28 hb2    | 2 hz3     | 3.34         | 0.54                        | 0.64                        |
| 26    | 28 ha     | 2 he3     | 3.35         | 0.54                        | 0.65                        |
| 26    | 28 he3    | 2 hz3     | 3.39         | 0.56                        | 0.86                        |
| 26    | 28 he3    | 2 he3     | 3.67         | 0.65                        | 0.96                        |
| 26    | 28 hb2    | 2 he3     | 3.7          | 0.66                        | 0.78                        |
| 26    | 28 he3    | 2 hd1     | 3.83         | 0.7                         | 1.03                        |
| 26    | 28 hz3    | 2 hn      | 3.95         | 0.73                        | 0.89                        |
| 26    | 29 hb2    | 3 he#     | 3.32         | 0.51                        | 0.83                        |
| 26    | 29 hb1    | 3 hd#     | 3.34         | 0.52                        | 0.84                        |
| 26    | 29 hb2    | 3 hd#     | 3.34         | 0.52                        | 0.84                        |
| 26    | 2 hz3     | 28 hn     | 3.9          | 0.72                        | 0.87                        |
| 26    | 3 hd#     | 29 hn     | 3.33         | 0.52                        | 0.83                        |
| 26    | 3 he#     | 29 hn     | 3.44         | 0.55                        | 0.86                        |
| 25    | 2 hz3     | 27 hn     | 3.83         | 0.7                         | 0.83                        |
| 25    | 2 he3     | 27 hn     | 3.84         | 0.7                         | 0.84                        |
| 24    | 26 hg2    | 2 he3     | 2.86         | 0.39                        | 0.51                        |
| 24    | 26 hg1    | 2 he3     | 3.42         | 0.57                        | 0.67                        |
| 24    | 26 hb1    | 2 he3     | 4.08         | 0.78                        | 0.96                        |
| 24    | 27 hn     | 3 hn      | 3.03         | 0.44                        | 0.35                        |
| 24    | 27 hb1    | 3 hz      | 3.38         | 0.55                        | 0.65                        |
| 24    | 27 hb1    | 3 he#     | 3.56         | 0.59                        | 0.9                         |
| 24    | 27 hb2    | 3 hz      | 3.88         | 0.71                        | 0.86                        |
| 24    | 27 hb1    | 3 hd#     | 4.02         | 0.74                        | 1.09                        |
| 24    | 27 hb2    | 3 hd#     | 4.06         | 0.75                        | 1.11                        |
| 23    | 4 ha      | 27 hn     | 3.64         | 0.63                        | 0.55                        |
| 23    | 4 hd#     | 27 hn     | 4.05         | 0.75                        | 1.11                        |
| 22    | 26 hb2    | 4 he#     | 3.15         | 0.46                        | 0.78                        |
| 22    | 26 hb2    | 4 hd#     | 3.55         | 0.59                        | 0.9                         |
| 22    | 26 hd1    | 4 he#     | 3.61         | 0.6                         | 0.92                        |
| 22    | 26 ha     | 4 hd#     | 3.66         | 0.62                        | 0.94                        |
| 22    | 26 hb1    | 4 he#     | 4.08         | 0.76                        | 1.12                        |
| 22    | 26 hg1    | 4 he#     | 4.17         | 0.78                        | 1.17                        |
| 21    | 26 ha     | 5 hn      | 3.39         | 0.56                        | 0.46                        |

|    |    |      |    |      |      |      |      |
|----|----|------|----|------|------|------|------|
| 20 | 24 | he3  | 4  | hd#  | 3.47 | 0.56 | 1.08 |
| 20 | 25 | hb2  | 5  | hd#  | 3.08 | 0.44 | 0.76 |
| 20 | 4  | hb2  | 24 | he3  | 2.56 | 0.29 | 0.45 |
| 20 | 4  | hb1  | 24 | he3  | 3.21 | 0.5  | 0.6  |
| 20 | 4  | ha   | 24 | he3  | 3.53 | 0.6  | 0.71 |
| 20 | 5  | hb2  | 25 | hn   | 3.49 | 0.59 | 0.49 |
| 20 | 5  | hb1  | 25 | hn   | 3.96 | 0.74 | 0.69 |
| 19 | 24 | he3  | 5  | hn   | 3.08 | 0.46 | 0.57 |
| 19 | 6  | ha   | 25 | hn   | 3.35 | 0.54 | 0.45 |
| 18 | 24 | he3  | 6  | hn   | 4.5  | 1.16 | 1.36 |
| 18 | 24 | hh2  | 6  | hn   | 4.5  | 1.36 | 1.56 |
| 18 | 6  | hb1  | 24 | hz3  | 2.67 | 0.33 | 0.47 |
| 18 | 6  | ha   | 24 | hn   | 3.08 | 0.46 | 0.37 |
| 18 | 6  | hb2  | 24 | hz3  | 3.15 | 0.48 | 0.58 |
| 18 | 6  | hd21 | 24 | he1  | 3.28 | 0.52 | 0.62 |
| 18 | 6  | hb1  | 24 | hh2  | 3.31 | 0.53 | 0.63 |
| 18 | 6  | hb2  | 24 | he3  | 3.32 | 0.53 | 0.64 |
| 18 | 6  | hd22 | 24 | he1  | 3.59 | 0.62 | 0.73 |
| 18 | 6  | hb1  | 24 | he3  | 3.65 | 0.64 | 0.75 |
| 18 | 6  | hd21 | 24 | he3  | 3.68 | 0.65 | 0.77 |
| 18 | 6  | ha   | 24 | he3  | 3.76 | 0.67 | 0.8  |
| 18 | 6  | ha   | 24 | hb1  | 3.92 | 0.72 | 0.67 |
| 18 | 6  | hd22 | 24 | hn   | 4.04 | 0.76 | 0.74 |
| 17 | 23 | ha2  | 6  | hd22 | 3.57 | 0.62 | 0.53 |
| 17 | 23 | ha2  | 6  | hd21 | 4.18 | 0.81 | 0.82 |
| 17 | 24 | ha   | 7  | hn   | 3.18 | 0.49 | 0.39 |
| 16 | 23 | ha2  | 7  | hn   | 3.85 | 0.7  | 0.64 |
| 16 | 23 | ha1  | 7  | hb1  | 4.06 | 0.77 | 0.75 |
| 15 | 23 | ha2  | 8  | hd1# | 3.95 | 0.6  | 0.5  |
| 15 | 23 | ha1  | 8  | hd1# | 4    | 0.6  | 0.5  |
| 15 | 21 | hg2# | 6  | hd2* | 3.59 | 0.62 | 0.53 |
| 13 | 11 | hb2  | 24 | hh2  | 3.87 | 1.01 | 1.15 |
| 13 | 11 | hb2  | 24 | hz3  | 3.87 | 1.01 | 1.15 |
| 13 | 11 | hb1  | 24 | hh2  | 4.02 | 0.96 | 1.13 |
| 13 | 11 | hg1  | 24 | hh2  | 4.06 | 0.97 | 1.15 |
| 13 | 17 | hd1  | 4  | hd#  | 3.6  | 0.6  | 0.92 |
| 13 | 17 | hd2  | 4  | hd#  | 3.84 | 0.68 | 1.01 |
| 13 | 17 | hd2  | 4  | he#  | 3.99 | 0.73 | 1.08 |
| 13 | 17 | hd1  | 4  | he#  | 4.03 | 0.74 | 1.1  |
| 13 | 17 | hg2  | 4  | hd#  | 4.16 | 0.78 | 1.16 |
| 13 | 1  | hg2  | 14 | hd#  | 3.99 | 0.73 | 1.08 |
| 13 | 1  | hg2  | 14 | he#  | 4.21 | 0.79 | 1.19 |

|    |        |         |      |      |      |
|----|--------|---------|------|------|------|
| 13 | 1 hg1  | 14 he#  | 4.47 | 0.88 | 1.34 |
| 12 | 16 ha  | 4 he#   | 3.16 | 0.46 | 0.79 |
| 12 | 4 he#  | 16 hn   | 3.53 | 0.58 | 0.89 |
| 11 | 13 hg2 | 24 hh2  | 4.6  | 0.94 | 1.31 |
| 11 | 14 ha  | 3 hb1   | 3.35 | 0.54 | 0.44 |
| 11 | 14 ha  | 3 hd#   | 3.65 | 0.62 | 0.94 |
| 11 | 14 ha  | 3 hb2   | 4    | 0.75 | 0.72 |
| 11 | 15 ha  | 4 he#   | 3.98 | 0.72 | 1.07 |
| 11 | 15 ha  | 4 hd#   | 6.46 | 1.51 | 4.17 |
| 11 | 24 hz3 | 13 hn   | 3.22 | 0.5  | 0.61 |
| 11 | 3 hb1  | 14 hd#  | 3.01 | 0.42 | 0.75 |
| 11 | 3 hb2  | 14 hd#  | 3.35 | 0.52 | 0.84 |
| 10 | 14 ha  | 4 hd#   | 3.19 | 0.47 | 0.79 |
| 10 | 14 ha  | 4 hn    | 3.41 | 0.56 | 0.46 |
| 10 | 3 hd#  | 13 hn   | 3.6  | 0.6  | 0.92 |
| 9  | 12 hb2 | 3 hd#   | 2.75 | 0.33 | 0.69 |
| 9  | 12 hg2 | 3 he#   | 3.01 | 0.42 | 0.75 |
| 9  | 12 hg1 | 3 he#   | 3.34 | 0.52 | 0.83 |
| 9  | 12 hg2 | 3 hd#   | 3.62 | 0.61 | 0.93 |
| 9  | 12 hg1 | 3 hd#   | 4.03 | 0.74 | 1.1  |
| 9  | 4 hn   | 13 hn   | 3.15 | 0.48 | 0.38 |
| 9  | 4 hb1  | 13 hn   | 4.18 | 0.81 | 0.82 |
| 8  | 5 ha   | 13 hn   | 3.7  | 0.65 | 0.58 |
| 7  | 12 hb2 | 5 hd#   | 2.62 | 0.29 | 0.67 |
| 7  | 12 ha  | 5 hd#   | 2.75 | 0.33 | 0.69 |
| 7  | 12 hb2 | 5 he#   | 4.17 | 0.78 | 1.16 |
| 7  | 12 hg1 | 5 he#   | 4.46 | 0.87 | 1.34 |
| 7  | 17 ha  | 24 hd1  | 4    | 1.2  | 1.5  |
| 7  | 17 hb1 | 24 hd1  | 4.5  | 1.2  | 1.5  |
| 7  | 17 hb2 | 24 he1  | 3.48 | 0.58 | 0.69 |
| 7  | 5 ha   | 12 ha   | 3.04 | 0.45 | 0.36 |
| 6  | 12 ha  | 6 hn    | 3.53 | 0.6  | 0.51 |
| 6  | 18 hb2 | 12 hn   | 3.43 | 0.57 | 0.47 |
| 5  | 10 ha1 | 5 he#   | 3.13 | 0.45 | 0.78 |
| 5  | 10 ha1 | 5 hz    | 3.19 | 0.49 | 0.6  |
| 5  | 10 ha2 | 5 hz    | 3.52 | 0.6  | 0.7  |
| 5  | 10 ha2 | 5 he#   | 3.62 | 0.61 | 0.93 |
| 5  | 11 hn  | 6 hn    | 2.9  | 0.7  | 0.62 |
| 4  | 6 hb1  | 10 hn   | 3.51 | 0.59 | 0.5  |
| 4  | 17 ha  | 13 he2* | 3.13 | 0.48 | 0.38 |
| 4  | 17 ha  | 13 he2* | 2.64 | 0.32 | 0.27 |
| 4  | 17 hd1 | 13 he2* | 3.75 | 0.67 | 0.6  |

|   |    |      |    |      |      |      |      |
|---|----|------|----|------|------|------|------|
| 3 | 17 | hd1  | 20 | hn   | 3.83 | 0.7  | 0.63 |
| 3 | 21 | ha   | 24 | hd1  | 2.66 | 0.33 | 0.47 |
| 3 | 21 | hb   | 24 | hd1  | 3.06 | 0.45 | 0.56 |
| 3 | 21 | hb   | 24 | he1  | 3.19 | 0.49 | 0.6  |
| 3 | 21 | ha   | 24 | he1  | 3.37 | 0.55 | 0.65 |
| 3 | 24 | hd1  | 21 | hn   | 3.62 | 0.63 | 0.74 |
| 3 | 6  | hb1  | 9  | hn   | 3.8  | 0.69 | 0.62 |
| 3 | 7  | ha   | 10 | hn   | 3.41 | 0.56 | 0.46 |
| 3 | 21 | hg2# | 24 | hd1  | 2.72 | 0.35 | 0.28 |
| 3 | 21 | hg2# | 24 | he1  | 2.67 | 0.33 | 0.27 |
| 2 | 11 | hn   | 9  | hn   | 3.49 | 0.59 | 0.49 |
| 2 | 13 | hb1  | 15 | hn   | 3.14 | 0.48 | 0.38 |
| 2 | 13 | ha   | 15 | hn   | 3.41 | 0.56 | 0.46 |
| 2 | 13 | hg1  | 15 | hn   | 3.61 | 0.63 | 0.54 |
| 2 | 13 | hg2  | 15 | hn   | 3.66 | 0.64 | 0.56 |
| 2 | 22 | ha   | 24 | hn   | 3.01 | 0.44 | 0.35 |
| 2 | 7  | ha   | 5  | he#  | 2.43 | 0.23 | 0.64 |
| 2 | 7  | ha   | 5  | hz   | 2.97 | 0.42 | 0.54 |
| 2 | 7  | ha   | 5  | hd#  | 3.21 | 0.48 | 0.8  |
| 2 | 7  | hb2  | 5  | he#  | 3.34 | 0.52 | 0.84 |
| 2 | 8  | hn   | 10 | hn   | 3.15 | 0.48 | 0.39 |
| 2 | 9  | hb   | 11 | hn   | 3.56 | 0.61 | 0.52 |
| 2 | 9  | hg1  | 11 | hn   | 3.76 | 0.67 | 0.6  |
| 2 | 9  | ha   | 11 | hn   | 3.98 | 0.74 | 0.71 |
| 2 | 13 | he2* | 15 | hn   | 3.83 | 0.7  | 0.64 |
| 2 | 15 | hb2  | 13 | he2* | 3.25 | 0.51 | 0.41 |
| 2 | 15 | hb2  | 13 | he2* | 3.9  | 0.72 | 0.67 |
| 2 | 9  | hg2# | 11 | hn   | 3.84 | 0.7  | 0.64 |
| 1 | 10 | ha1  | 11 | hn   | 3.28 | 0.52 | 0.42 |
| 1 | 10 | ha2  | 11 | hn   | 4.03 | 0.76 | 0.73 |
| 1 | 10 | ha1  | 9  | hn   | 4.06 | 0.77 | 0.75 |
| 1 | 11 | hn   | 10 | hn   | 2.58 | 0.3  | 0.25 |
| 1 | 11 | ha   | 12 | hn   | 2.14 | 0.16 | 0.18 |
| 1 | 11 | hb2  | 12 | hn   | 4    | 0.95 | 0.92 |
| 1 | 12 | ha   | 13 | hn   | 2.24 | 0.19 | 0.2  |
| 1 | 12 | hb2  | 13 | hn   | 2.84 | 0.38 | 0.31 |
| 1 | 12 | hn   | 13 | hn   | 3.96 | 0.74 | 0.7  |
| 1 | 13 | ha   | 14 | hn   | 2.22 | 0.19 | 0.19 |
| 1 | 13 | hb1  | 14 | hn   | 2.97 | 0.42 | 0.34 |
| 1 | 13 | hg2  | 14 | hn   | 3.6  | 0.62 | 0.53 |
| 1 | 13 | hg1  | 14 | hn   | 4.13 | 0.79 | 0.79 |
| 1 | 14 | hb1  | 15 | hn   | 3.13 | 0.47 | 0.38 |



|   |         |        |      |      |      |
|---|---------|--------|------|------|------|
| 1 | 14 hb2  | 15 hn  | 3.38 | 0.55 | 0.45 |
| 1 | 14 ha   | 15 hn  | 3.45 | 0.58 | 0.48 |
| 1 | 14 hd#  | 15 hn  | 4.27 | 0.81 | 1.22 |
| 1 | 15 hn   | 14 hn  | 2.55 | 0.29 | 0.25 |
| 1 | 15 ha   | 16 hn  | 1.92 | 0.19 | 0.26 |
| 1 | 15 hb1  | 16 hn  | 2.78 | 0.36 | 0.29 |
| 1 | 15 hb2  | 16 hn  | 2.87 | 0.39 | 0.31 |
| 1 | 15 hn   | 16 hn  | 3.68 | 0.65 | 0.57 |
| 1 | 16 ha   | 17 hd1 | 2.36 | 0.23 | 0.22 |
| 1 | 16 ha   | 17 hd2 | 2.53 | 0.28 | 0.24 |
| 1 | 17 ha   | 18 hn  | 2.1  | 0.15 | 0.18 |
| 1 | 17 hb1  | 18 hn  | 3.29 | 0.52 | 0.43 |
| 1 | 17 hb2  | 18 hn  | 3.35 | 0.55 | 0.45 |
| 1 | 18 ha   | 19 hn  | 2.42 | 0.25 | 0.23 |
| 1 | 18 hb2  | 19 hn  | 3.52 | 0.8  | 0.71 |
| 1 | 1 ha    | 2 hn   | 2.23 | 0.19 | 0.2  |
| 1 | 1 hg2   | 2 hn   | 3.09 | 0.46 | 0.37 |
| 1 | 1 ha    | 2 hd1  | 3.55 | 0.61 | 0.71 |
| 1 | 1 hb2   | 2 hn   | 3.62 | 0.63 | 0.54 |
| 1 | 1 hg1   | 2 hn   | 3.64 | 0.64 | 0.55 |
| 1 | 20 hb2  | 19 hn  | 3.53 | 0.6  | 0.51 |
| 1 | 20 ha   | 21 hn  | 2.28 | 0.21 | 0.2  |
| 1 | 20 hb2  | 21 hn  | 3.74 | 0.67 | 0.59 |
| 1 | 20 hd2# | 21 hn  | 4.72 | 0.87 | 0.82 |
| 1 | 21 hn   | 20 hn  | 3.41 | 0.56 | 0.46 |
| 1 | 21 ha   | 22 hn  | 2.09 | 0.15 | 0.18 |
| 1 | 21 hb   | 22 hn  | 2.96 | 0.42 | 0.33 |
| 1 | 21 hn   | 22 hn  | 3.07 | 0.96 | 0.86 |
| 1 | 22 ha   | 23 hn  | 2.39 | 0.24 | 0.22 |
| 1 | 22 hb2  | 23 hn  | 3.2  | 0.5  | 0.4  |
| 1 | 22 hn   | 23 hn  | 3.85 | 0.7  | 0.64 |
| 1 | 23 ha2  | 24 hn  | 3.28 | 0.52 | 0.42 |
| 1 | 23 ha1  | 24 hn  | 3.46 | 0.58 | 0.48 |
| 1 | 24 hn   | 23 hn  | 2.9  | 0.4  | 0.32 |
| 1 | 24 ha   | 25 hn  | 2.25 | 0.19 | 0.2  |
| 1 | 24 he3  | 25 hn  | 3.03 | 0.44 | 0.55 |
| 1 | 24 hb1  | 25 hn  | 3.32 | 0.54 | 0.44 |
| 1 | 24 hb2  | 25 hn  | 3.81 | 0.69 | 0.62 |
| 1 | 25 ha   | 26 hn  | 2.09 | 0.15 | 0.18 |
| 1 | 25 hb1  | 26 hn  | 3.42 | 0.57 | 0.47 |
| 1 | 25 hg1  | 26 hn  | 3.67 | 0.65 | 0.56 |
| 1 | 26 ha   | 27 hn  | 2.15 | 0.16 | 0.18 |

|   |         |        |      |      |      |
|---|---------|--------|------|------|------|
| 1 | 26 hg2  | 27 hn  | 3.76 | 0.67 | 0.6  |
| 1 | 26 hg1  | 27 hn  | 3.83 | 0.7  | 0.63 |
| 1 | 27 ha   | 28 hn  | 2.26 | 0.2  | 0.2  |
| 1 | 27 hb2  | 28 hn  | 2.95 | 0.42 | 0.33 |
| 1 | 27 hg2  | 28 hn  | 3.47 | 0.58 | 0.48 |
| 1 | 27 hb1  | 28 hn  | 3.66 | 0.64 | 0.56 |
| 1 | 27 hg1  | 28 hn  | 3.77 | 0.68 | 0.6  |
| 1 | 28 ha   | 29 hn  | 2.18 | 0.17 | 0.19 |
| 1 | 28 hb2  | 29 hn  | 3.71 | 0.66 | 0.58 |
| 1 | 28 hb1  | 29 hn  | 3.87 | 0.71 | 0.65 |
| 1 | 2 ha    | 3 hn   | 2.23 | 0.19 | 0.2  |
| 1 | 2 he3   | 3 hn   | 3.16 | 0.48 | 0.59 |
| 1 | 2 hb1   | 3 hn   | 3.17 | 0.49 | 0.39 |
| 1 | 2 hb2   | 3 hn   | 3.38 | 0.55 | 0.46 |
| 1 | 3 hb2   | 4 hn   | 2.63 | 0.32 | 0.26 |
| 1 | 3 hb1   | 4 hn   | 3.18 | 0.49 | 0.39 |
| 1 | 3 hb1   | 4 hd#  | 3.28 | 0.5  | 0.82 |
| 1 | 3 hd#   | 4 hn   | 3.29 | 0.5  | 0.82 |
| 1 | 3 hb1   | 4 he#  | 3.68 | 0.63 | 0.95 |
| 1 | 3 ha    | 4 hn   | 2.5  | 0.7  | 1.5  |
| 1 | 4 ha    | 5 hn   | 2.32 | 0.22 | 0.21 |
| 1 | 4 hb2   | 5 hn   | 3.46 | 0.58 | 0.48 |
| 1 | 4 hd#   | 5 hn   | 3.81 | 0.67 | 1    |
| 1 | 4 hb1   | 5 hn   | 3.97 | 0.74 | 0.7  |
| 1 | 5 ha    | 6 hn   | 2.27 | 0.2  | 0.2  |
| 1 | 5 hd#   | 6 hn   | 2.74 | 0.33 | 0.69 |
| 1 | 5 hb2   | 6 hn   | 4.16 | 0.8  | 0.8  |
| 1 | 6 ha    | 7 hn   | 2.08 | 0.14 | 0.18 |
| 1 | 7 hb1   | 8 hn   | 3.32 | 0.53 | 0.44 |
| 1 | 8 hn    | 7 hn   | 2.62 | 0.31 | 0.26 |
| 1 | 8 hb    | 9 hn   | 2.61 | 0.31 | 0.26 |
| 1 | 8 ha    | 9 hn   | 3.38 | 0.55 | 0.46 |
| 1 | 8 hg2#  | 9 hn   | 3.73 | 0.56 | 0.45 |
| 1 | 8 hg12  | 9 hn   | 4.2  | 0.81 | 0.83 |
| 1 | 9 hn    | 10 hn  | 2.35 | 0.23 | 0.21 |
| 1 | 9 ha    | 10 hn  | 2.88 | 0.39 | 0.31 |
| 1 | 9 hb    | 10 hn  | 3.51 | 0.6  | 0.5  |
| 1 | 9 hn    | 8 hn   | 2.51 | 0.28 | 0.24 |
| 1 | 9 ha    | 8 hg2# | 3.9  | 0.61 | 0.5  |
| 1 | 21 hg2# | 20 hn  | 3.69 | 0.65 | 0.57 |
| 1 | 21 hg2# | 22 hn  | 2.76 | 0.36 | 0.29 |
| 1 | 9 hg2#  | 10 hn  | 3.34 | 0.54 | 0.44 |

|   |        |        |      |      |      |
|---|--------|--------|------|------|------|
| 1 | 9 hg2# | 8 hb   | 3.42 | 0.57 | 0.47 |
| 1 | 9 hg2# | 8 hn   | 3.6  | 0.62 | 0.53 |
| 1 | 9 hg2# | 8 hg2# | 2.18 | 0.17 | 0.19 |
| 0 | 10 ha1 | 10 hn  | 2.39 | 0.24 | 0.22 |
| 0 | 10 ha2 | 10 hn  | 2.84 | 0.38 | 0.31 |
| 0 | 11 hb2 | 11 hn  | 2.65 | 0.52 | 0.47 |
| 0 | 11 hb1 | 11 hn  | 2.89 | 0.6  | 0.52 |
| 0 | 11 ha  | 11 hn  | 2.91 | 0.41 | 0.32 |
| 0 | 11 hg2 | 11 hn  | 2.91 | 0.6  | 0.52 |
| 0 | 11 ha  | 11 hb1 | 3.02 | 0.64 | 0.55 |
| 0 | 11 hg1 | 11 hn  | 3.05 | 0.65 | 0.56 |
| 0 | 11 ha  | 11 hd2 | 3.13 | 0.68 | 0.58 |
| 0 | 11 ha  | 11 hg1 | 3.5  | 0.79 | 0.7  |
| 0 | 11 hd2 | 11 hn  | 3.51 | 0.79 | 0.7  |
| 0 | 11 ha  | 11 hg2 | 3.59 | 0.82 | 0.73 |
| 0 | 12 hb1 | 12 hn  | 2.89 | 0.4  | 0.32 |
| 0 | 12 hb2 | 12 ha  | 3.02 | 0.44 | 0.35 |
| 0 | 12 hb2 | 12 hn  | 3.07 | 0.46 | 0.36 |
| 0 | 12 ha  | 12 hn  | 3.15 | 0.48 | 0.38 |
| 0 | 12 hg2 | 12 hn  | 3.19 | 0.49 | 0.4  |
| 0 | 12 hd1 | 12 he  | 3.31 | 0.53 | 0.43 |
| 0 | 12 hd2 | 12 he  | 3.34 | 0.54 | 0.44 |
| 0 | 12 hg1 | 12 hn  | 3.57 | 0.61 | 0.52 |
| 0 | 12 hb2 | 12 he  | 3.64 | 0.64 | 0.55 |
| 0 | 12 hg1 | 12 he  | 3.69 | 0.65 | 0.57 |
| 0 | 13 ha  | 13 hn  | 2.77 | 0.36 | 0.29 |
| 0 | 13 hb2 | 13 hn  | 3.01 | 0.44 | 0.35 |
| 0 | 13 hb1 | 13 hn  | 3.3  | 0.53 | 0.43 |
| 0 | 13 hg1 | 13 hn  | 3.38 | 0.55 | 0.46 |
| 0 | 13 hg2 | 13 hn  | 3.76 | 0.67 | 0.6  |
| 0 | 14 hd# | 14 he# | 1.97 | 0.07 | 1.02 |
| 0 | 14 ha  | 14 hd# | 2.39 | 0.22 | 0.63 |
| 0 | 14 hb1 | 14 hd# | 2.55 | 0.27 | 0.66 |
| 0 | 14 hb2 | 14 hd# | 2.61 | 0.29 | 0.67 |
| 0 | 14 hd# | 14 hz  | 2.74 | 0.33 | 0.9  |
| 0 | 14 hb1 | 14 hn  | 2.78 | 0.36 | 0.29 |
| 0 | 14 ha  | 14 hn  | 2.85 | 0.38 | 0.31 |
| 0 | 14 ha  | 14 hb1 | 3.03 | 0.44 | 0.35 |
| 0 | 14 hb2 | 14 hn  | 3.09 | 0.46 | 0.37 |
| 0 | 14 hd# | 14 hn  | 3.19 | 0.47 | 0.79 |
| 0 | 14 ha  | 14 hb2 | 3.32 | 0.54 | 0.44 |
| 0 | 14 ha  | 14 he# | 3.4  | 0.54 | 0.85 |

|   |    |      |    |      |      |      |      |
|---|----|------|----|------|------|------|------|
| 0 | 14 | hb2  | 14 | he#  | 4.06 | 0.75 | 1.11 |
| 0 | 15 | ha   | 15 | hb2  | 2.45 | 0.26 | 0.23 |
| 0 | 15 | hb1  | 15 | hn   | 2.47 | 0.27 | 0.23 |
| 0 | 15 | hb2  | 15 | hn   | 2.51 | 0.28 | 0.24 |
| 0 | 15 | ha   | 15 | hn   | 2.6  | 0.31 | 0.26 |
| 0 | 15 | hg1  | 15 | hn   | 3.45 | 0.58 | 0.48 |
| 0 | 15 | hg2  | 15 | hn   | 3.48 | 0.59 | 0.49 |
| 0 | 16 | hb2  | 16 | hn   | 2.19 | 0.18 | 0.19 |
| 0 | 16 | hb1  | 16 | hn   | 2.23 | 0.19 | 0.2  |
| 0 | 16 | ha   | 16 | hn   | 2.78 | 0.36 | 0.29 |
| 0 | 16 | hg2  | 16 | hn   | 3.51 | 0.6  | 0.5  |
| 0 | 16 | ha   | 16 | hg2  | 3.59 | 0.62 | 0.53 |
| 0 | 17 | ha   | 17 | hb1  | 2.58 | 0.3  | 0.25 |
| 0 | 17 | ha   | 17 | hb2  | 2.87 | 0.39 | 0.31 |
| 0 | 18 | he2  | 18 | hd2  | 2.64 | 0.52 | 0.47 |
| 0 | 18 | hb1  | 18 | hn   | 2.76 | 0.56 | 0.49 |
| 0 | 18 | ha   | 18 | hn   | 2.78 | 0.56 | 0.49 |
| 0 | 18 | ha   | 18 | hb2  | 3.06 | 0.65 | 0.56 |
| 0 | 18 | hb2  | 18 | hn   | 3.18 | 0.69 | 0.59 |
| 0 | 18 | ha   | 18 | hb1  | 3.35 | 0.74 | 0.64 |
| 0 | 18 | hg2  | 18 | hn   | 3.5  | 0.59 | 0.5  |
| 0 | 18 | ha   | 18 | hg2  | 3.77 | 0.88 | 0.81 |
| 0 | 18 | hg1  | 18 | hn   | 3.92 | 0.93 | 0.88 |
| 0 | 18 | ha   | 18 | hg1  | 4.59 | 1.14 | 1.31 |
| 0 | 1  | ha   | 1  | hg2  | 2.95 | 0.42 | 0.33 |
| 0 | 1  | ha   | 1  | hg1  | 3.37 | 0.55 | 0.45 |
| 0 | 1  | ha   | 1  | hb2  | 3.45 | 0.58 | 0.48 |
| 0 | 20 | ha   | 20 | hb2  | 2.53 | 0.28 | 0.24 |
| 0 | 20 | hb2  | 20 | hn   | 2.65 | 0.32 | 0.27 |
| 0 | 20 | ha   | 20 | hn   | 3.05 | 0.65 | 0.56 |
| 0 | 20 | ha   | 20 | hd2# | 3.1  | 0.36 | 0.3  |
| 0 | 20 | hg   | 20 | hn   | 3.16 | 0.48 | 0.39 |
| 0 | 20 | ha   | 20 | hg   | 3.23 | 0.51 | 0.41 |
| 0 | 20 | ha   | 20 | hd1# | 3.78 | 0.58 | 0.46 |
| 0 | 20 | hd1# | 20 | hn   | 4.51 | 0.81 | 0.72 |
| 0 | 20 | hd2# | 20 | hn   | 4.84 | 0.91 | 0.88 |
| 0 | 21 | ha   | 21 | hn   | 2.65 | 0.32 | 0.27 |
| 0 | 21 | ha   | 21 | hb   | 2.85 | 0.39 | 0.31 |
| 0 | 21 | hb   | 21 | hn   | 2.89 | 0.4  | 0.32 |
| 0 | 22 | hb2  | 22 | hn   | 2.36 | 0.5  | 0.5  |
| 0 | 22 | hb2  | 22 | hn   | 2.36 | 0.5  | 0.5  |
| 0 | 22 | ha   | 22 | hn   | 2.4  | 0.54 | 0.52 |

|   |    |     |    |     |      |      |      |
|---|----|-----|----|-----|------|------|------|
| 0 | 22 | hd2 | 22 | hn  | 3.64 | 0.64 | 0.55 |
| 0 | 22 | hg1 | 22 | hn  | 3.65 | 0.64 | 0.56 |
| 0 | 22 | hg2 | 22 | hn  | 3.77 | 0.68 | 0.6  |
| 0 | 23 | ha1 | 23 | hn  | 2.95 | 0.42 | 0.33 |
| 0 | 23 | ha2 | 23 | hn  | 3.26 | 0.52 | 0.42 |
| 0 | 24 | hb2 | 24 | hn  | 2.48 | 0.27 | 0.24 |
| 0 | 24 | hb1 | 24 | he3 | 2.69 | 0.34 | 0.48 |
| 0 | 24 | hb2 | 24 | hd1 | 2.7  | 0.34 | 0.48 |
| 0 | 24 | hd1 | 24 | hn  | 2.83 | 0.38 | 0.5  |
| 0 | 24 | ha  | 24 | he3 | 2.85 | 0.39 | 0.51 |
| 0 | 24 | hb1 | 24 | hn  | 2.94 | 0.41 | 0.33 |
| 0 | 24 | hb1 | 24 | hd1 | 2.97 | 0.42 | 0.54 |
| 0 | 24 | ha  | 24 | hn  | 2.98 | 0.43 | 0.34 |
| 0 | 24 | hb2 | 24 | he3 | 3.55 | 0.61 | 0.72 |
| 0 | 25 | ha  | 25 | hn  | 2.99 | 0.43 | 0.34 |
| 0 | 25 | hb2 | 25 | hn  | 3.49 | 0.59 | 0.49 |
| 0 | 25 | hb1 | 25 | hn  | 3.78 | 0.68 | 0.61 |
| 0 | 25 | hg1 | 25 | hn  | 4.29 | 0.84 | 0.89 |
| 0 | 26 | hb1 | 26 | hn  | 2.85 | 0.39 | 0.31 |
| 0 | 26 | hb2 | 26 | hn  | 2.89 | 0.4  | 0.32 |
| 0 | 26 | ha  | 26 | hn  | 2.98 | 0.43 | 0.34 |
| 0 | 26 | ha  | 26 | hb2 | 3.41 | 0.56 | 0.46 |
| 0 | 26 | ha  | 26 | hb1 | 3.59 | 0.62 | 0.53 |
| 0 | 26 | he1 | 26 | hd1 | 3.62 | 0.63 | 0.54 |
| 0 | 26 | ha  | 26 | hg1 | 3.72 | 0.66 | 0.59 |
| 0 | 26 | he2 | 26 | hd2 | 3.94 | 0.73 | 0.69 |
| 0 | 26 | hg1 | 26 | hn  | 3.94 | 0.73 | 0.68 |
| 0 | 26 | ha  | 26 | hg2 | 4.45 | 0.89 | 1    |
| 0 | 27 | hb1 | 27 | hg1 | 2.72 | 0.34 | 0.28 |
| 0 | 27 | hb1 | 27 | hg2 | 2.85 | 0.39 | 0.31 |
| 0 | 27 | ha  | 27 | hb2 | 2.86 | 0.39 | 0.31 |
| 0 | 27 | ha  | 27 | hn  | 2.96 | 0.42 | 0.33 |
| 0 | 27 | ha  | 27 | hg2 | 3.06 | 0.45 | 0.36 |
| 0 | 27 | ha  | 27 | hg1 | 3.14 | 0.48 | 0.38 |
| 0 | 27 | hg2 | 27 | he  | 3.16 | 0.48 | 0.39 |
| 0 | 27 | hd1 | 27 | he  | 3.2  | 0.5  | 0.4  |
| 0 | 27 | hg1 | 27 | he  | 3.22 | 0.5  | 0.41 |
| 0 | 27 | hb1 | 27 | hn  | 3.3  | 0.53 | 0.43 |
| 0 | 27 | hb2 | 27 | hn  | 3.33 | 0.54 | 0.44 |
| 0 | 27 | hd2 | 27 | hb1 | 3.74 | 0.67 | 0.59 |
| 0 | 27 | hd1 | 27 | hb1 | 3.77 | 0.68 | 0.61 |
| 0 | 27 | ha  | 27 | hb1 | 3.82 | 0.69 | 0.63 |

|   |    |     |    |     |      |      |      |
|---|----|-----|----|-----|------|------|------|
| 0 | 27 | hg1 | 27 | hn  | 4.01 | 0.75 | 0.72 |
| 0 | 28 | he1 | 28 | hd1 | 1.93 | 0.1  | 0.56 |
| 0 | 28 | hz3 | 28 | hh2 | 2.12 | 0.15 | 0.58 |
| 0 | 28 | hb1 | 28 | hd1 | 2.45 | 0.26 | 0.43 |
| 0 | 28 | he3 | 28 | hz3 | 2.52 | 0.28 | 0.64 |
| 0 | 28 | hb1 | 28 | hn  | 2.71 | 0.34 | 0.28 |
| 0 | 28 | hb2 | 28 | hd1 | 2.81 | 0.37 | 0.5  |
| 0 | 28 | hb2 | 28 | hn  | 2.91 | 0.4  | 0.32 |
| 0 | 28 | ha  | 28 | hn  | 3.01 | 0.44 | 0.35 |
| 0 | 28 | he3 | 28 | hh2 | 3.43 | 0.57 | 0.87 |
| 0 | 28 | hb1 | 28 | he1 | 4.06 | 0.77 | 0.95 |
| 0 | 29 | ha  | 29 | hn  | 2.89 | 0.4  | 0.32 |
| 0 | 29 | hb2 | 29 | hn  | 3.43 | 0.57 | 0.47 |
| 0 | 29 | hb1 | 29 | hn  | 3.49 | 0.59 | 0.49 |
| 0 | 2  | hz3 | 2  | hh2 | 1.97 | 0.11 | 0.56 |
| 0 | 2  | he1 | 2  | hd1 | 2.01 | 0.12 | 0.57 |
| 0 | 2  | hh2 | 2  | hz2 | 2.13 | 0.16 | 0.58 |
| 0 | 2  | hb2 | 2  | hd1 | 2.57 | 0.3  | 0.45 |
| 0 | 2  | hz3 | 2  | he3 | 2.64 | 0.32 | 0.67 |
| 0 | 2  | ha  | 2  | he3 | 2.68 | 0.33 | 0.47 |
| 0 | 2  | hb2 | 2  | hn  | 2.81 | 0.37 | 0.3  |
| 0 | 2  | hb1 | 2  | hd1 | 2.9  | 0.4  | 0.52 |
| 0 | 2  | hb1 | 2  | he3 | 3.08 | 0.46 | 0.56 |
| 0 | 2  | hd1 | 2  | hn  | 3.11 | 0.47 | 0.57 |
| 0 | 2  | hb1 | 2  | hn  | 3.13 | 0.47 | 0.38 |
| 0 | 2  | ha  | 2  | hn  | 3.19 | 0.49 | 0.4  |
| 0 | 2  | hb2 | 2  | he3 | 3.33 | 0.54 | 0.64 |
| 0 | 2  | he3 | 2  | hh2 | 3.45 | 0.58 | 0.88 |
| 0 | 3  | he# | 3  | hz  | 1.87 | 0.06 | 0.77 |
| 0 | 3  | he# | 3  | hd# | 1.95 | 0.06 | 1.02 |
| 0 | 3  | hb2 | 3  | hd# | 2.49 | 0.25 | 0.65 |
| 0 | 3  | hb1 | 3  | hd# | 2.49 | 0.25 | 0.65 |
| 0 | 3  | hd# | 3  | hn  | 3    | 0.41 | 0.75 |
| 0 | 3  | ha  | 3  | hd# | 3.1  | 0.44 | 0.77 |
| 0 | 3  | ha  | 3  | hn  | 3.15 | 0.48 | 0.38 |
| 0 | 3  | he# | 3  | hn  | 4.01 | 0.73 | 1.09 |
| 0 | 3  | hb1 | 3  | hn  | 4.16 | 0.8  | 0.81 |
| 0 | 4  | hb2 | 4  | hd# | 2.62 | 0.29 | 0.67 |
| 0 | 4  | hb1 | 4  | hd# | 2.7  | 0.32 | 0.68 |
| 0 | 4  | hb1 | 4  | hn  | 2.74 | 0.35 | 0.28 |
| 0 | 4  | hd# | 4  | hn  | 2.83 | 0.36 | 0.71 |
| 0 | 4  | ha  | 4  | hd# | 3.04 | 0.42 | 0.75 |

|   |   |      |   |      |      |      |      |
|---|---|------|---|------|------|------|------|
| 0 | 4 | hb2  | 4 | he#  | 3.35 | 0.52 | 0.84 |
| 0 | 4 | hb2  | 4 | hn   | 3.37 | 0.55 | 0.45 |
| 0 | 4 | ha   | 4 | hn   | 3.62 | 0.63 | 0.54 |
| 0 | 4 | hb1  | 4 | he#  | 3.78 | 0.66 | 0.98 |
| 0 | 5 | hd#  | 5 | he#  | 1.95 | 0.06 | 1.02 |
| 0 | 5 | hb2  | 5 | hd#  | 2.33 | 0.2  | 0.62 |
| 0 | 5 | hb1  | 5 | hd#  | 2.46 | 0.24 | 0.64 |
| 0 | 5 | ha   | 5 | hd#  | 2.57 | 0.28 | 0.66 |
| 0 | 5 | hd#  | 5 | hz   | 2.66 | 0.3  | 0.88 |
| 0 | 5 | hb1  | 5 | hn   | 2.89 | 0.4  | 0.32 |
| 0 | 5 | hb2  | 5 | hn   | 3.21 | 0.5  | 0.4  |
| 0 | 5 | ha   | 5 | hn   | 3.25 | 0.51 | 0.41 |
| 0 | 5 | hd#  | 5 | hn   | 3.78 | 0.66 | 0.99 |
| 0 | 6 | ha   | 6 | hn   | 2.44 | 0.46 | 0.43 |
| 0 | 6 | hb2  | 6 | hn   | 2.78 | 0.36 | 0.29 |
| 0 | 6 | hb1  | 6 | hn   | 2.94 | 0.41 | 0.33 |
| 0 | 6 | hd21 | 6 | hb2  | 3.2  | 0.5  | 0.4  |
| 0 | 6 | ha   | 6 | hb2  | 3.24 | 0.51 | 0.41 |
| 0 | 6 | hb2  | 6 | hd22 | 3.33 | 0.54 | 0.44 |
| 0 | 6 | ha   | 6 | hb1  | 3.59 | 0.62 | 0.53 |
| 0 | 6 | hd21 | 6 | hb1  | 3.74 | 0.67 | 0.59 |
| 0 | 7 | hb1  | 7 | hn   | 2.33 | 0.22 | 0.21 |
| 0 | 7 | ha   | 7 | hb1  | 2.5  | 0.27 | 0.24 |
| 0 | 7 | ha   | 7 | hb2  | 2.5  | 0.27 | 0.24 |
| 0 | 7 | ha   | 7 | hn   | 2.66 | 0.33 | 0.27 |
| 0 | 7 | hg1  | 7 | hn   | 3    | 0.43 | 0.35 |
| 0 | 7 | hg2  | 7 | hn   | 3.06 | 0.45 | 0.36 |
| 0 | 7 | ha   | 7 | hg2  | 3.2  | 0.5  | 0.4  |
| 0 | 7 | hd1  | 7 | hb1  | 3.3  | 0.53 | 0.43 |
| 0 | 7 | hd1  | 7 | hg1  | 3.33 | 0.54 | 0.44 |
| 0 | 7 | ha   | 7 | hg1  | 3.46 | 0.58 | 0.48 |
| 0 | 7 | hd2  | 7 | he   | 3.47 | 0.58 | 0.49 |
| 0 | 7 | hd1  | 7 | he   | 3.78 | 0.68 | 0.61 |
| 0 | 7 | hd2  | 7 | hg2  | 3.83 | 0.7  | 0.63 |
| 0 | 7 | hb1  | 7 | he   | 3.86 | 0.71 | 0.65 |
| 0 | 8 | hb   | 8 | hn   | 2.47 | 0.26 | 0.23 |
| 0 | 8 | ha   | 8 | hn   | 2.8  | 0.37 | 0.3  |
| 0 | 8 | ha   | 8 | hg2# | 2.83 | 0.28 | 0.26 |
| 0 | 8 | hg12 | 8 | hn   | 3.02 | 0.44 | 0.35 |
| 0 | 8 | hg11 | 8 | hn   | 3.23 | 0.51 | 0.41 |
| 0 | 8 | ha   | 8 | hg12 | 3.33 | 0.54 | 0.44 |
| 0 | 8 | ha   | 8 | hd1# | 3.41 | 0.46 | 0.37 |

|   |         |         |      |      |      |
|---|---------|---------|------|------|------|
| 0 | 8 ha    | 8 hb    | 3.69 | 0.65 | 0.57 |
| 0 | 8 hg2#  | 8 hn    | 3.86 | 0.6  | 0.48 |
| 0 | 8 hd1#  | 8 hn    | 4.06 | 0.67 | 0.55 |
| 0 | 9 ha    | 9 hn    | 3.28 | 0.52 | 0.42 |
| 0 | 9 hb    | 9 hn    | 3.75 | 0.67 | 0.6  |
| 0 | 9 hg1   | 9 hn    | 4.2  | 0.81 | 0.83 |
| 0 | 13 hb2  | 13 he2* | 3.13 | 0.48 | 0.38 |
| 0 | 13 hg1  | 13 he2* | 2.71 | 0.34 | 0.28 |
| 0 | 13 hg1  | 13 he2* | 3.34 | 0.54 | 0.44 |
| 0 | 13 hg2  | 13 he2* | 3.39 | 0.56 | 0.46 |
| 0 | 21 hg2# | 21 hn   | 2.39 | 0.24 | 0.22 |
| 0 | 21 ha   | 21 hg2# | 2.3  | 0.21 | 0.21 |
| 0 | 9 hg2#  | 9 hn    | 2.49 | 0.27 | 0.24 |
| 0 | 9 ha    | 9 hg2#  | 2.13 | 0.16 | 0.18 |
| 0 | 9 hb    | 9 hg2#  | 2.1  | 0.15 | 0.18 |

### Supporting References

1. Eidschink, L. A.; Kier, B. L.; Huggins, K. N. L.; Andersen, N. H. *Prot. Struct. Funct. Bioinf.* **2009**, *75*, 308.
2. Fesinmeyer, R. M.; Hudson, F. M.; Olsen, K. A.; White, G. W. N.; Euser, A., Andersen, N. H. *J. Biomol. NMR* **2005**, *33*, 213.
3. Shu, I.; Scian, M.; Stewart, J. M.; Kier, B. L.; Andersen, N. H. *J. BioMol. NMR* **2013**, *56*, 313.
4. Kier, B. L.; Shu, I.; Eidschink, L. A.; Andersen NH. *Proc. Natl. Acad. Sci. USA* **2010**, *107*, 10466.
5. Andersen, N. H.; Olsen, K. A.; Fesinmeyer, R. M.; Tan, X.; Hudson, F. M.; Eidschink, L. A.; Farazi, S. R. *J. Am. Chem. Soc.* **2006**, *128*, 6101.
6. Williams, D. V.; Byrne, A.; Stewart, J. M.; Andersen, N. H. *Biochemistry* **2011**, *50*, 1143.
7. Barua, B.; Lin, J. C.; Williams, D. V.; Neidigh, J. W.; Kummeler, P.; Andersen, N. H. *PEDS* **2008**, *21*, 171.
8. Scian, M.; Lin, J. C., Le Trong, I.; Makhatadze, G. I.; Stenkamp, R. E.; Andersen, N. H. *Proc. Natl. Acad. Sci. USA* **2012**, *109*, 12521.
